# Supplementary material for: A Robust Process to Produce Lignocellulosic Nanofibers from Corn Stover, Reed Canary Grass, and Industrial Hemp
Source: MDPI journal article supplement (doi:10.3390/polym15040937), 2023-02-14
Supplement: s1 [file s1]

## **Supporting Information**

### **A robust process to produce lignocellulosic nanofibers from corn stover, reed canary grass, and industrial hemp**

*Danielle Uchimura Pascoli*<sup>1,2,\*</sup>, *Anthony Dichiara*<sup>1</sup>, *Rick Gustafson*<sup>1</sup> and *Renata Bura*<sup>1,\*</sup>.

\*Corresponding authors

<sup>1</sup> School of Environmental and Forest Sciences, University of Washington, Seattle, WA 98195, USA

<sup>2</sup> VERDE Nanomaterials Inc. Davis, CA 95618, USA

\*Correspondence: [dpascoli@verdenano.com](mailto:dpascoli@verdenano.com) (D.U.P.); [renatab@uw.edu](mailto:renatab@uw.edu) (R.B.)

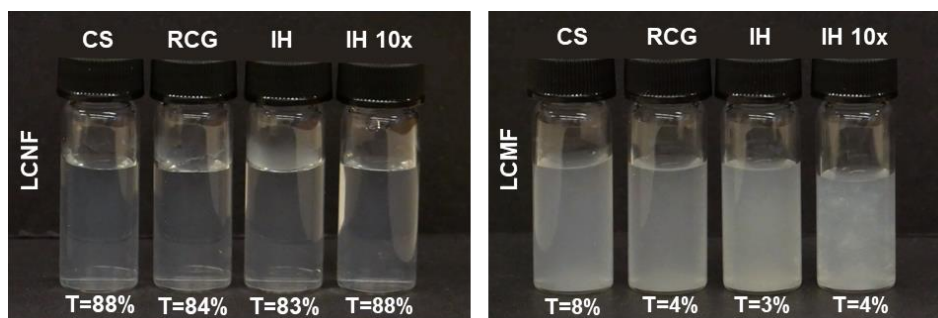

**Figure S1.** Photograph of the suspensions and their respective percent transmittance at 660 nm.

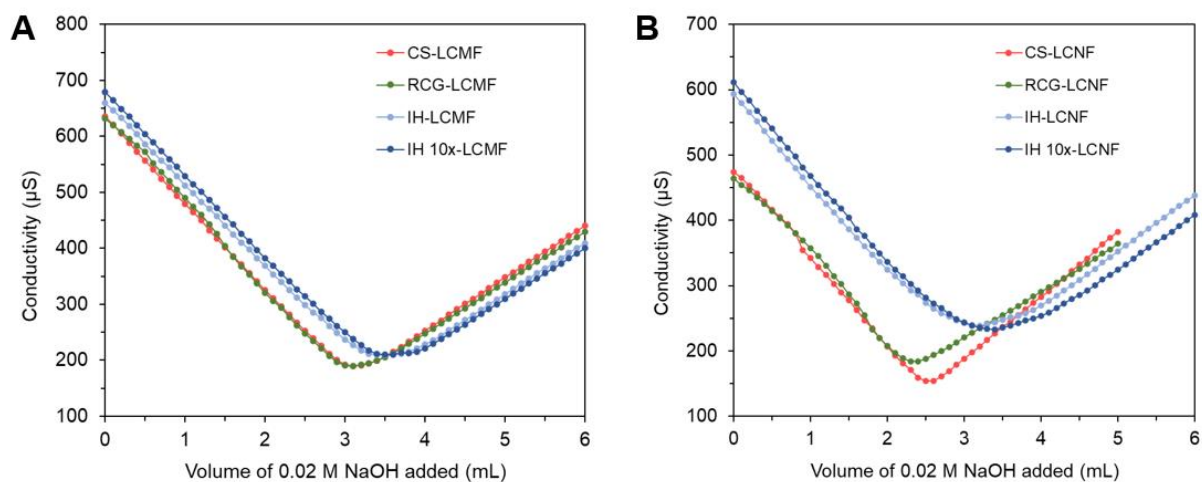

**Figure S2.** Conductometric titration curves of (A) LCMF and (B) LCNF from different feedstocks.

**Table S1.** Total mass yield and chemical composition of untreated biomass feedstocks, alkaline peroxide pulps, and PAA treated pulps of corn stover (CS), reed canary grass (RCG), and industrial hemp (IH). In the special case of IH, one additional PAA reaction condition was studied employing about 10 times higher PAA charge.

|                  |        |                      | Chemical composition (% of oven-dry weight) |                       |            |           |               |
|------------------|--------|----------------------|---------------------------------------------|-----------------------|------------|-----------|---------------|
|                  |        | Total mass yield (%) | Holocellulose <sup>a</sup> %                | Uronic/acetic acids % | Lignin %   | Ash %     | Extractives % |
| Untreated        | CS     | -                    | 71.9 ± 2.1                                  | 3.8 ± 0.2             | 21.3 ± 0.2 | 3.4 ± 0.1 | 7.8 ± 0.1     |
|                  | RCG    | -                    | 50.4 ± 0.4                                  | 3.1 ± 0.1             | 21.5 ± 0.2 | 8.2 ± 0.1 | 29.6 ± 0.1    |
|                  | IH     | -                    | 55.5 ± 0.2                                  | 5.5 ± 0.2             | 19.3 ± 0.2 | 5.2 ± 0.0 | 16.5 ± 0.3    |
| Pulp             | CS     | 60.6                 | 90.3 ± 0.3                                  | 0.0 ± 0.0             | 6.5 ± 0.2  | 1.3 ± 0.2 | 2.1 ± 0.5     |
|                  | RCG    | 49.0                 | 79.5 ± 0.3                                  | 0.0 ± 0.0             | 9.7 ± 0.2  | 2.3 ± 0.1 | 4.2 ± 0.1     |
|                  | IH     | 64.4                 | 70.7 ± 3.4                                  | 0.0 ± 0.0             | 19.1 ± 0.1 | 3.5 ± 0.2 | 3.0 ± 0.3     |
| PAA treated pulp | CS     | 50.2                 | 95.0 ± 0.3                                  | 0.0 ± 0.0             | 2.3 ± 0.3  | < 0.1     | NM            |
|                  | RCG    | 40.0                 | 86.7 ± 2.5                                  | 0.0 ± 0.0             | 3.6 ± 0.1  | 0.2 ± 0.0 | NM            |
|                  | IH     | 44.2                 | 81.3 ± 0.5                                  | 0.0 ± 0.0             | 12.0 ± 0.2 | 2.2 ± 0.1 | NM            |
|                  | IH 10x | 36.2                 | 92.7 ± 1.0                                  | 0.0 ± 0.0             | 3.1 ± 0.1  | 1.5 ± 0.0 | NM            |

NM = Not measured

<sup>a</sup> For detailed carbohydrate composition of holocellulose, see Supporting Information, Table S3

**Table S2.** Holocellulose and lignin recovery after alkaline peroxide pulping and PAA treatment related to the untreated biomass.

|                         |               | Holocellulose recovery (%) | Lignin recovery (%) |
|-------------------------|---------------|----------------------------|---------------------|
| <b>Pulp</b>             | <b>CS</b>     | 76                         | 19                  |
|                         | <b>RCG</b>    | 77                         | 22                  |
|                         | <b>IH</b>     | 82                         | 64                  |
| <b>PAA treated pulp</b> | <b>CS</b>     | 66                         | 5                   |
|                         | <b>RCG</b>    | 69                         | 7                   |
|                         | <b>IH</b>     | 65                         | 28                  |
|                         | <b>IH 10x</b> | 60                         | 6                   |

**Table S3.** Relative carbohydrate composition in holocellulose of untreated biomass, alkaline peroxide pulps, and PAA treated pulps of the different biomass feedstocks.

|                    |               | Arabinan (%) | Galactan (%) | Glucan (%) | Xylan (%) | Mannan (%) |
|--------------------|---------------|--------------|--------------|------------|-----------|------------|
| <b>Untreated</b>   | <b>CS</b>     | 3.4          | 1.1          | 58.5       | 37.0      | 0.0        |
|                    | <b>RCG</b>    | 5.7          | 2.5          | 60.7       | 31.0      | 0.0        |
|                    | <b>IH</b>     | 2.3          | 3.5          | 70.8       | 21.2      | 2.2        |
| <b>Pulp</b>        | <b>CS</b>     | 2.3          | 0.4          | 64.7       | 32.6      | 0.0        |
|                    | <b>RCG</b>    | 5.3          | 1.4          | 62.7       | 30.6      | 0.0        |
|                    | <b>IH</b>     | 0.7          | 1.7          | 72.3       | 23.6      | 1.6        |
| <b>PAA treated</b> | <b>CS</b>     | 2.3          | 0.3          | 66.1       | 31.4      | 0.0        |
|                    | <b>RCG</b>    | 2.4          | 0.5          | 69.7       | 27.4      | 0.0        |
|                    | <b>IH</b>     | 0.3          | 0.9          | 71.8       | 25.7      | 1.3        |
|                    | <b>IH 10x</b> | 0.3          | 0.8          | 72.1       | 24.6      | 2.2        |
